# Supplementary material for: Seroprevalence of hepatitis E in adults in Brazil: a systematic review and meta-analysis
Source: PubMed Central journal article supplement (PMC6334402; doi:10.1186/s40249-018-0514-4), 2019-01-16
Supplement: 40249_2018_514_MOESM7_ESM.pdf [file 40249_2018_514_MOESM7_ESM.pdf]

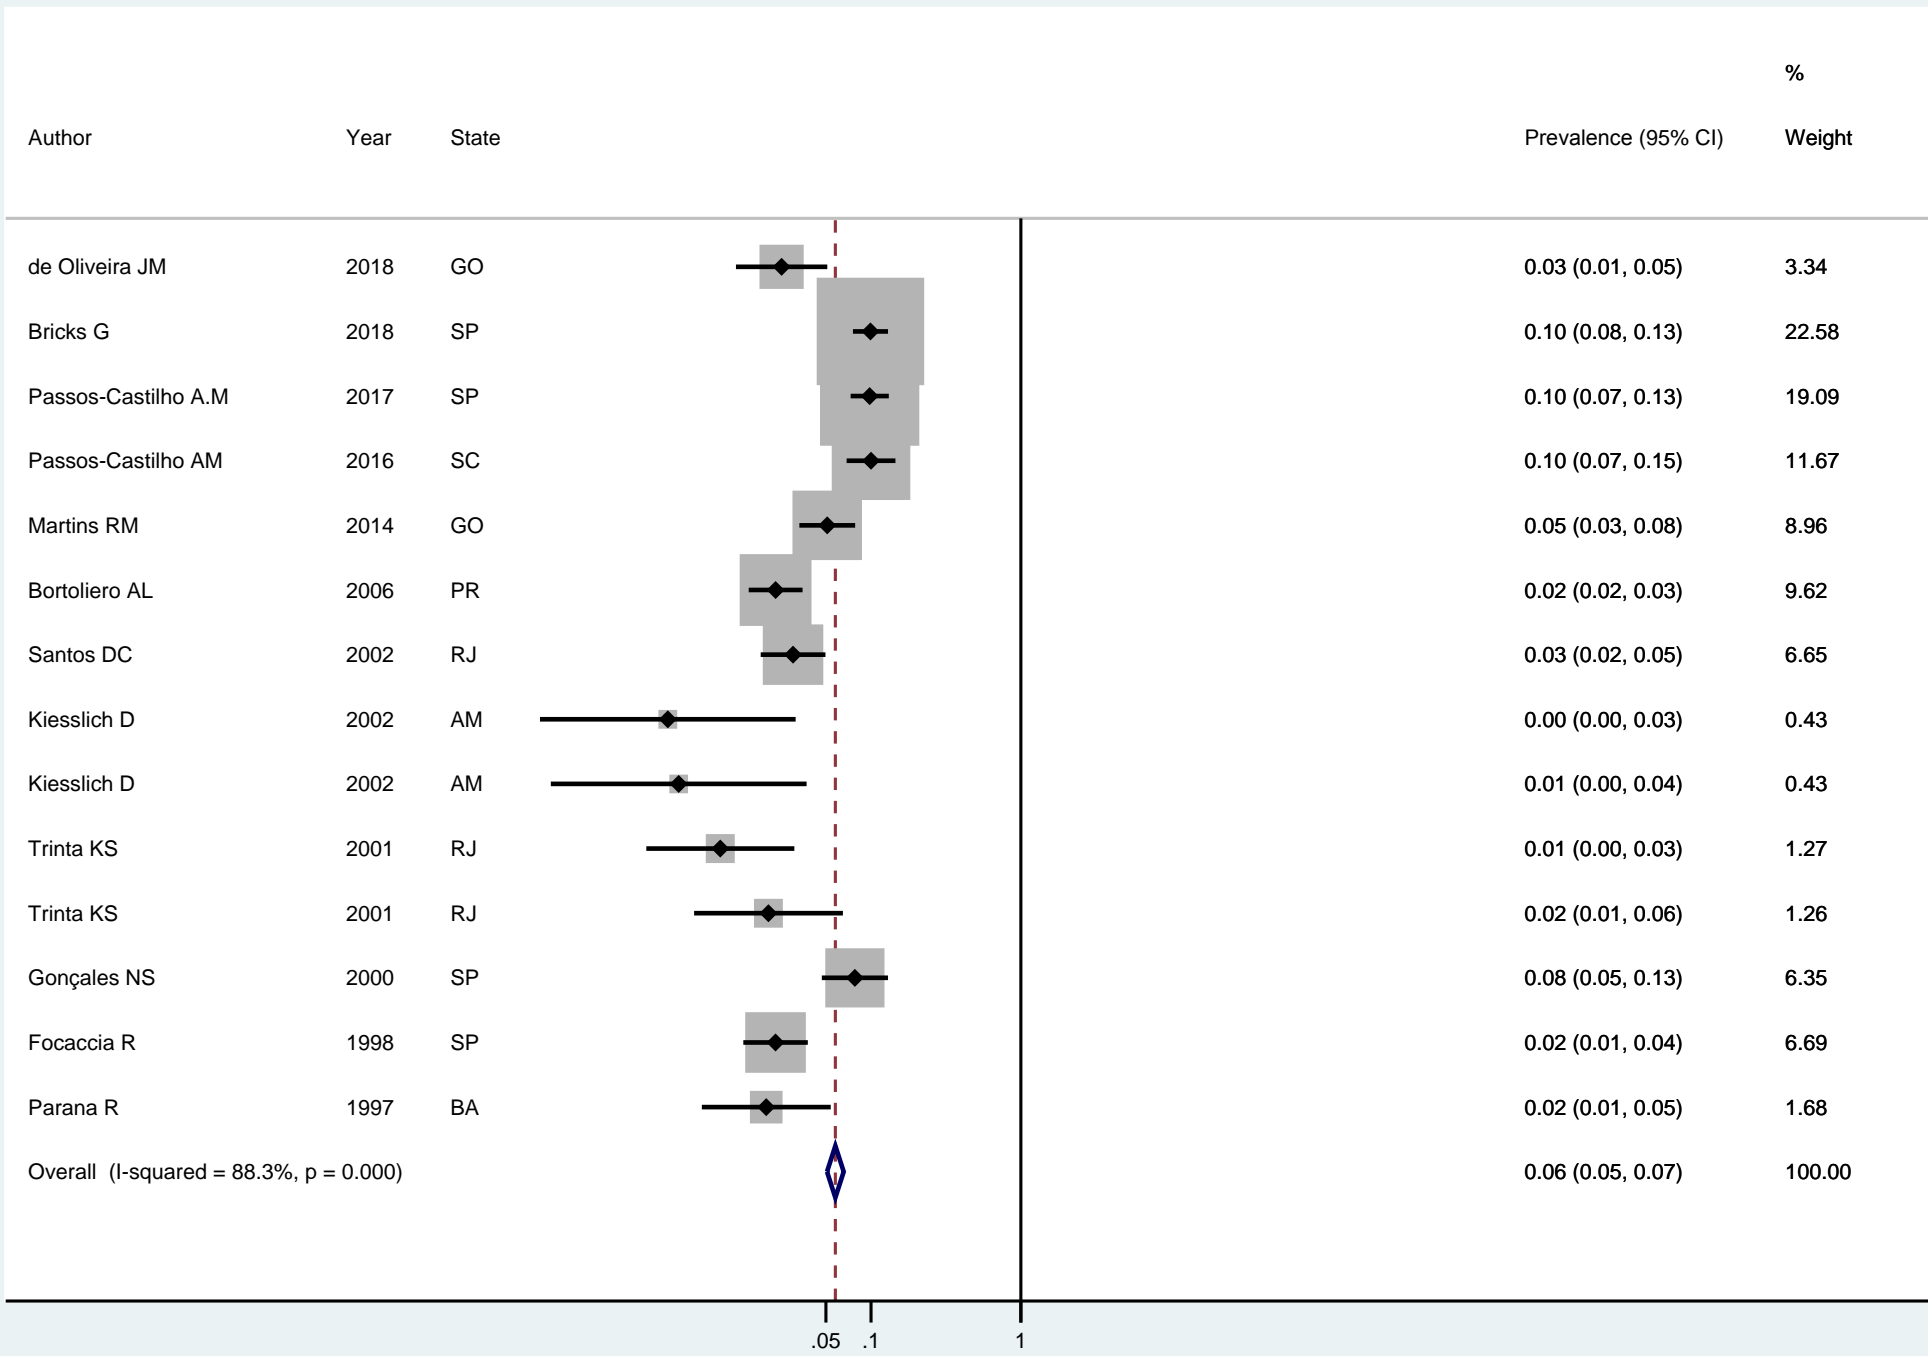

Prevalence
